# Supplementary material for: Genetic Manipulation of the Toxoplasma gondii Genome by Fosmid Recombineering
Source: PubMed Central journal article supplement — mBio. 2014 Dec 2;5(6):e02021-14. doi: 10.1128/mBio.02021-14 (PMC4324243; doi:10.1128/mbio.02021-14), 2014-12-02
Supplement: mbo006142079sf1.pdf [file mbo006142079sf1.pdf]

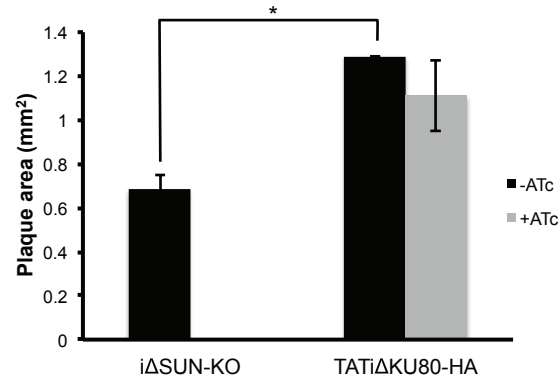

Fig. S1. Quantification of the area of plaques formed by iΔSUN-KO and ΔKU80TATi-HA parasite lines after 7 days of growth on HFF monolayers. The average area of 25 plaques was assessed for each line. The mean area  $\pm$  SD are plotted for 3 independent experiments. In the absence of ATc, the plaques formed by iΔSUN-KO were significantly smaller in size than the parental TATiΔKU80-HA line (\*  $P < 0.0001$ , Student's *t*-test). ATc, anhydrotetracycline; SD, Standard Deviation.
