# Supplementary material for: Genetic Manipulation of the Toxoplasma gondii Genome by Fosmid Recombineering
Source: PubMed Central journal article supplement — mBio. 2014 Dec 2;5(6):e02021-14. doi: 10.1128/mBio.02021-14 (PMC4324243; doi:10.1128/mbio.02021-14), 2014-12-02
Supplement: mbo006142079st1.pdf [file mbo006142079st1.pdf]

**Table S1:** Sequences of the primers used in the study

| <b>Primer</b> | <b>Sequence (5' to 3')</b>                                                       |
|---------------|----------------------------------------------------------------------------------|
| PC1F          | GGATGTGCTGCAAGGCGATTAAGTTGG                                                      |
| PC1R          | CTCGTATGTTGTGTGGAATTGTGAGC                                                       |
| SUN_LICF      | TACTTCCAATCCAATTTAATGCACCACTGTACTGTTGATGCGT<br>CTGTG                             |
| SUN_LICR      | TCCTCCACTTCCAATTTTAGCCGCACGCTTCTTAGAAATACTT<br>GC                                |
| SUN_PR_F      | TGCGGCTGCCGCGAAATGCAGTGAAGGTATTTTCAGCAATTG<br>GCACATGGAATGGTAACCGACAAACGCGTTC    |
| RCC_LICF      | TACTTCCAATCCAATTTAATGCACCTAAGACAGACCT<br>TGCCAAGGCCGC                            |
| RCC_LICR      | TCCTCCACTTCCAATTTTAGCTCGACTGTTTGGGCGCC                                           |
| SUN_PR_R      | ATCCGTCCTCCCTTCTGGTCCAGTTGCCTCGACGCGGTTTTCT<br>GTTTCATAGATCTGGTTGAAGACAGACGAAAGC |
| P1            | ATGCTAACAGCAGATGGCACGACTCTC                                                      |
| P2            | GCACGGCAGTCAGATAACAGGTGTA                                                        |
| P3            | CGCCTTGGCGAATGTTTCATGAC                                                          |
| P4            | GTAGCCGTCGTCCTGATCTTGGAC                                                         |
| P5            | AACGCATGCACCTACAAATCGACAC                                                        |
| P6            | ATCACTTATTCAGGCGTAGCAACC                                                         |
| P7            | CGCGAATAAATACCTGTGACGGAAG                                                        |
| KinR          | ATCTTTCCAGCTACACATCTGCGTC                                                        |
| culR          | AAGACGTCGACTTCCGATGCAAAC                                                         |
| IMCR          | CTGAGAAGCTTCGGCAGTCACGTG                                                         |
| SMCR          | GTTTCTATGGCGGAAGTGACCATGT                                                        |
