# Supplementary material for: Genetic Manipulation of the Toxoplasma gondii Genome by Fosmid Recombineering
Source: PubMed Central journal article supplement — mBio. 2014 Dec 2;5(6):e02021-14. doi: 10.1128/mBio.02021-14 (PMC4324243; doi:10.1128/mbio.02021-14), 2014-12-02
Supplement: mbo006142079st2.pdf [file mbo006142079st2.pdf]

**Table S2:** Number of genes covered by the mapped cosmids (n=7773) and fosmids (n=5509) per *Toxoplasma gondii* chromosome

| Chromosome | Total number of genes | Number of genes covered by |         |
|------------|-----------------------|----------------------------|---------|
|            |                       | Cosmids                    | Fosmids |
| Ia         | 246                   | 234                        | 239     |
| Ib         | 256                   | 241                        | 224     |
| II         | 290                   | 263                        | 270     |
| III        | 321                   | 304                        | 293     |
| IV         | 342                   | 331                        | 319     |
| V          | 415                   | 385                        | 387     |
| VI         | 495                   | 466                        | 466     |
| VIIa       | 572                   | 534                        | 551     |
| VIIb       | 702                   | 653                        | 666     |
| VIII       | 968                   | 869                        | 895     |
| IX         | 851                   | 816                        | 823     |
| X          | 990                   | 949                        | 942     |
| XI         | 897                   | 819                        | 868     |
| XII        | 972                   | 918                        | 918     |
