# Supplementary material for: Genetic Manipulation of the Toxoplasma gondii Genome by Fosmid Recombineering
Source: PubMed Central journal article supplement — mBio. 2014 Dec 2;5(6):e02021-14. doi: 10.1128/mBio.02021-14 (PMC4324243; doi:10.1128/mbio.02021-14), 2014-12-02
Supplement: mbo006142079st3.pdf [file mbo006142079st3.pdf]

**Table S3:** Fosmids modified using liquid recombineering

| <b>Gene ID</b> | <b>Chromosome</b> | <b>Product</b>                                               | <b>Fosmid clone</b> | <b>Promoter Replacement</b> | <b>Promoter Insertion</b> |
|----------------|-------------------|--------------------------------------------------------------|---------------------|-----------------------------|---------------------------|
| TGME49_319710  | IV                | Kinesin motor domain-containing protein                      | RHfos24O11          | Yes                         | Yes                       |
| TGME49_316660  | XI                | Cullin family protein                                        | RHfos09P17          | Yes                         | Yes                       |
| TGME49_231640  | VIII              | Alveolin domain containing intermediate filament IMC1 (ALV1) | RHfos22M15          | No                          | Yes                       |
| TGME49_288700  | IX                | RecF/RecN/SMC N terminal domain-containing protein           | RHfos05B19          | No                          | Yes                       |
