# Supplementary material for: Genetic Manipulation of the Toxoplasma gondii Genome by Fosmid Recombineering
Source: PubMed Central journal article supplement — mBio. 2014 Dec 2;5(6):e02021-14. doi: 10.1128/mBio.02021-14 (PMC4324243; doi:10.1128/mbio.02021-14), 2014-12-02
Supplement: mbo006142079st4.pdf [file mbo006142079st4.pdf]

**Table S4:** Single nucleotide polymorphisms (SNPs) in the *Toxoplasma gondii* ts-mutant 13-136A8 identified by whole genome sequencing

| Gene ID      | Product                                                     | SNP     | Mutation | %mRNA <sup>a</sup> | mRNA <sup>b</sup> | Fosmid clone |
|--------------|-------------------------------------------------------------|---------|----------|--------------------|-------------------|--------------|
| TGGT1_311230 | Hypothetical                                                | Tgc/Agc | C3545S   | 70-95              | M/C               | RHfos20F20   |
| TGGT1_204520 | Hypothetical                                                | aAT/aGt | N148S    | 5-15               | M/C               | RHfos10H15   |
| TGGT1_255690 | 2-C-methyl-D-erythritol<br>2,4-cyclodiphosphate<br>synthase | Aaa/Gaa | K75E     | 25-65              | G1                | RHfos01J09   |
| TGGT1_248270 | Zn-finger CCCH-type<br>motif                                | Tcc/Gcc | S717A    | 55-70              | n/p               | RHfos2J15    |
| TGGT1_301170 | SAG-related sequence<br>SRS19D                              | aAc/aGc | N282S    | 20-80              | S                 | RHfos07K16   |
| TGGT1_213900 | Regulator of<br>chromosome<br>condensation RCC1             | gTg/gGg | V728G    | 40-45              | n/p               | RHfos19E05   |
| TGGT1_291050 | Histone kinase SNF1                                         | gTt/gCt | V1920A   | 15-35              | S/M               | RHfos10E09   |
| TGGT1_206580 | Formin FRM2                                                 | cAg/cTg | Q2795L   | 50-70              | C/G1              | -            |

<sup>a</sup>mRNA abundance in the tachyzoite stage (as percentile) from toxodb.org

<sup>b</sup>peak expression of the encoded mRNA from toxodb.org;

n/p: non-periodic (constitutive) expression
